# Supplementary material
Source: PubMed Central journal article supplement (PMC6640768)
Supplement: ao6b00170_si_001.pdf [file ao6b00170_si_001.pdf]

## *Supporting Information*

# **Theoretical Investigation of Promising Molecules of Obtaining Complexes with Planar Tetracoordinate Carbon**

Congjie Zhang,<sup>†\*</sup> Dongxia Ma,<sup>†</sup> Shaoni Yang<sup>†</sup> and Jinxia Liang<sup>‡\*</sup>

<sup>†</sup> Key Laboratory of Macromolecular Science of Shaanxi Province, School of  
Chemistry & Chemical Engineering, Shaanxi Normal University, Changan South  
Road 199, Xi'an, 710062, P. R. China

<sup>‡</sup> Guizhou Provincial Key Laboratory of Computational Nano-Material Science,  
Guizhou Education University, 115 Gaoxin Road, Wudang District, Guiyang, 550018,  
P. R. China.

|                                                                |    |
|----------------------------------------------------------------|----|
| 1. Table S1.....                                               | S2 |
| 2. Figure S1.....                                              | S3 |
| 3. Figure S2.....                                              | S4 |
| 4. Cartesian coordinates for all the species and energies..... | S5 |

**Table S1** The multiplicity, energies including zero point energy (E, in Hartree), relative energies ( $E_r$ , in kcal/mol).

| Isomers    | Multiplicity | E          | $E_r$ |
|------------|--------------|------------|-------|
| <b>A1</b>  | 1            | -180.10836 | 16.4  |
|            | 3            | -179.99772 | 85.8  |
| <b>A2</b>  | 1            | -180.10592 | 17.9  |
|            | 3            | -180.02309 | 69.9  |
| <b>A3</b>  | 1            | -180.05187 | 51.8  |
|            | 3            | -180.00846 | 79.0  |
| <b>A4</b>  | 1            | -180.10366 | 19.3  |
|            | 3            | -180.07127 | 39.6  |
| <b>A5</b>  | 5            | -179.93728 | 123.7 |
| <b>A6</b>  | 3            | -179.99661 | 86.5  |
| <b>A7</b>  | 1            | -180.09314 | 25.9  |
|            | 3            | -180.06281 | 44.9  |
| <b>A8</b>  | 1            | -180.05156 | 52.0  |
|            | 3            | -180.05373 | 50.6  |
| <b>A9</b>  | 1            | -180.13443 | 0.0   |
|            | 3            | -180.07819 | 35.3  |
| <b>A10</b> | 1            | -180.13357 | 0.5   |
|            | 3            | -180.06548 | 43.3  |

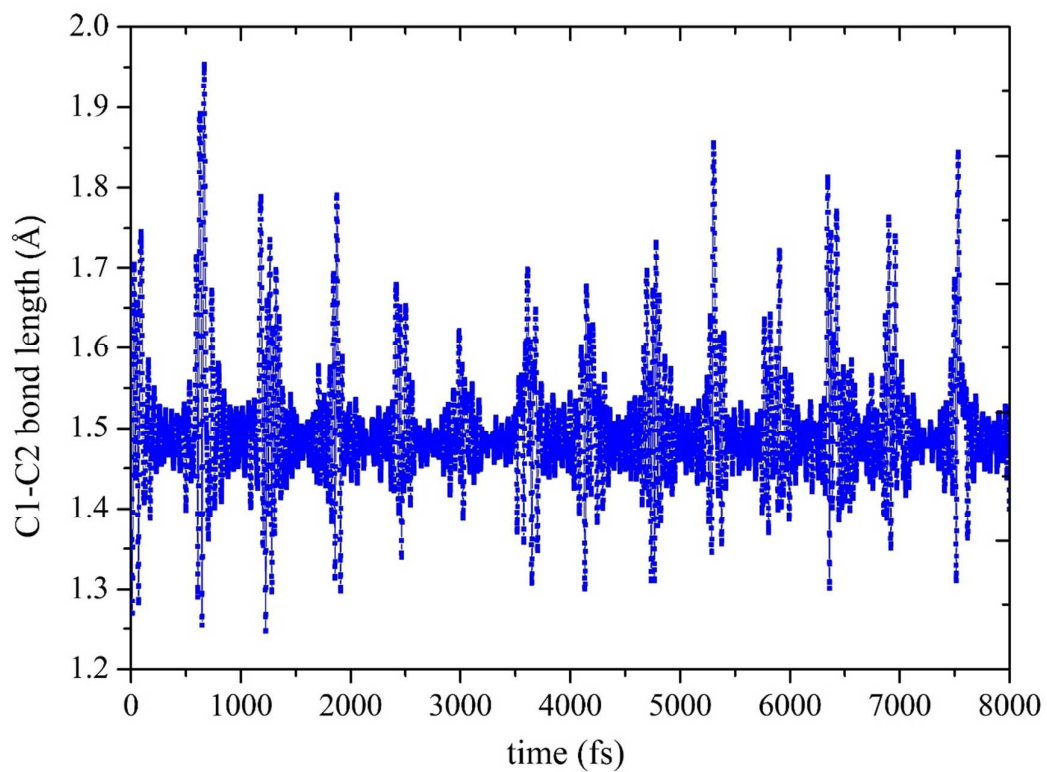

**Figure S1.** The evolution of C1-C2 bond length within 8000 fs from ab initio Molecular Dynamics (AIMD) simulations at  $T=1273$  K.

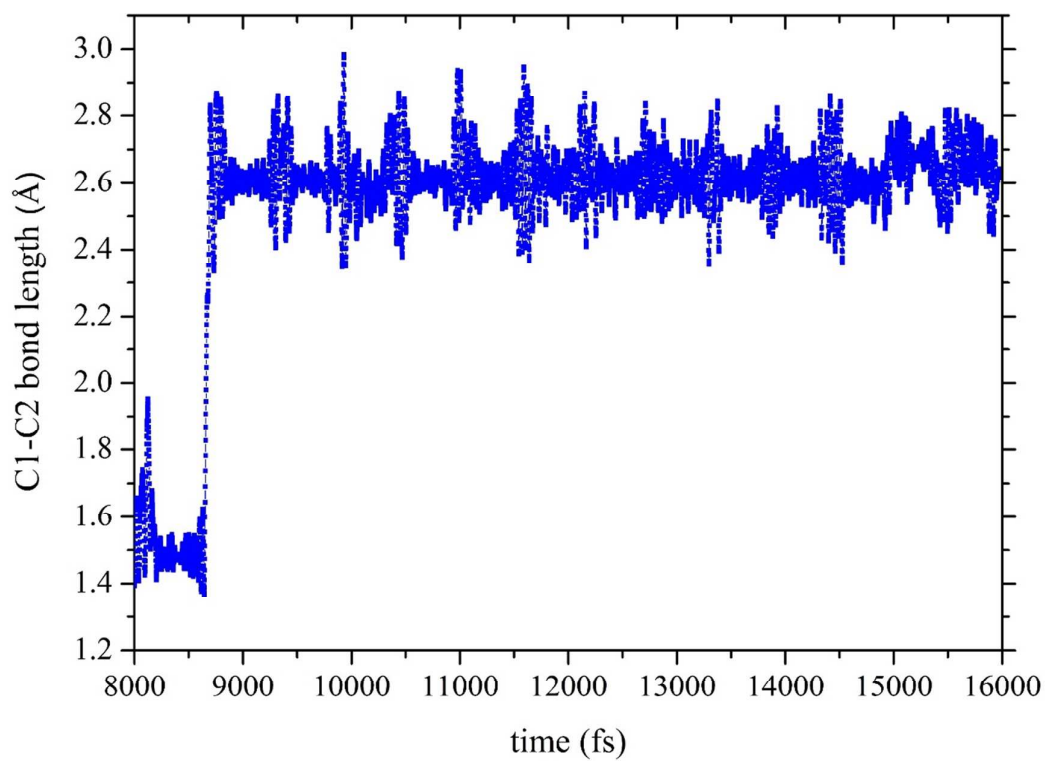

**Figure S2.** The evolution of C1-C2 bond length from 8000 fs to 16000 fs by ab initio Molecular Dynamics (AIMD) simulating at  $T=1273$  K.

## Cartesian coordinates for all the species and energies

### A1

**E=-180.18475 a.u.**

|   |           |           |           |
|---|-----------|-----------|-----------|
| C | -0.004043 | -1.910805 | 0.000000  |
| H | -0.917644 | -2.505764 | 0.000000  |
| H | 0.903620  | -2.514744 | 0.000000  |
| C | 0.001872  | -0.631117 | 0.735647  |
| C | 0.001872  | -0.631117 | -0.735647 |
| B | 0.009068  | 0.635181  | 0.000000  |
| C | 0.001872  | 2.188799  | 0.000000  |
| H | 0.494541  | 2.594180  | -0.889397 |
| H | -1.029845 | 2.561685  | 0.000000  |
| H | 0.494541  | 2.594180  | 0.889397  |

### A2

**E=-180.18344 a.u.**

|   |           |           |           |
|---|-----------|-----------|-----------|
| C | 1.862876  | -0.026575 | -0.000085 |
| H | 2.459858  | -0.146687 | 0.903192  |
| H | 2.459399  | -0.146656 | -0.903677 |
| C | 0.530596  | -0.733217 | 0.000078  |
| B | 0.656425  | 0.928989  | 0.000030  |
| C | -0.540358 | 0.087888  | 0.000263  |
| C | -2.018651 | -0.029058 | -0.000112 |
| H | -2.329049 | -1.077179 | -0.001824 |
| H | -2.439685 | 0.464211  | 0.882124  |
| H | -2.439426 | 0.467134  | -0.880834 |

### A3

**E=-180.12533 a.u.**

|   |           |           |           |
|---|-----------|-----------|-----------|
| C | -1.637531 | -0.693597 | 0.000001  |
| H | -1.816318 | -1.253698 | 0.918891  |
| H | -1.816174 | -1.253617 | -0.918975 |
| C | -0.480234 | 0.364770  | 0.000039  |
| C | -1.792418 | 0.789650  | -0.000032 |
| B | 0.886976  | 0.170962  | 0.000061  |
| C | 2.388071  | -0.100580 | -0.000003 |
| H | 2.687012  | -0.673413 | -0.886238 |
| H | 2.956012  | 0.838005  | -0.000042 |
| H | 2.687269  | -0.673549 | 0.886027  |

### A4

**E=-180.17738 a.u.**

|   |           |           |           |
|---|-----------|-----------|-----------|
| C | 2.162943  | -0.677515 | 0.006815  |
| H | 2.612937  | -1.016221 | -0.902956 |
| H | 2.617097  | -0.910188 | 0.947298  |
| C | 0.861647  | 0.144844  | -0.037386 |
| C | 0.178578  | 1.603185  | -0.011226 |
| B | -0.730684 | 0.187542  | 0.066564  |
| C | -2.204436 | -0.550632 | -0.008625 |
| H | -2.774386 | -0.298568 | 0.861157  |
| H | -2.724355 | -0.220727 | -0.883694 |
| H | -2.070272 | -1.611297 | -0.052096 |

### A5

**E=-180.00863 a.u.**

|   |          |           |           |
|---|----------|-----------|-----------|
| C | 2.006197 | -0.430884 | -0.000001 |
| H | 2.429549 | -0.887653 | 0.907175  |

|   |           |           |           |
|---|-----------|-----------|-----------|
| H | 2.429319  | -0.887573 | -0.907333 |
| C | -2.375698 | 0.072432  | 0.000000  |
| H | -2.570900 | 0.699873  | 0.885279  |
| H | -2.571050 | 0.699365  | -0.885626 |
| H | -3.116890 | -0.737377 | 0.000281  |
| C | -1.004753 | -0.439006 | -0.000007 |
| C | 1.580856  | 0.962757  | -0.000017 |
| B | 0.432071  | 0.024315  | 0.000075  |

### A6

**E=-180.06912 a.u.**

|   |           |           |           |
|---|-----------|-----------|-----------|
| C | -1.564556 | -0.730883 | 0.000119  |
| H | -1.660780 | -1.322940 | -0.911829 |
| H | -1.660083 | -1.321651 | 0.912956  |
| C | 2.084560  | -0.237808 | -0.000343 |
| H | 2.695002  | -0.008166 | 0.881225  |
| H | 1.866992  | -1.318299 | -0.000799 |
| H | 2.693995  | -0.007370 | -0.882389 |
| C | 0.848082  | 0.553447  | 0.000713  |
| B | -1.884921 | 0.790500  | -0.000810 |
| C | -0.453173 | 0.419565  | 0.000325  |

### A7

**E=-180.16705 a.u.**

|   |           |           |           |
|---|-----------|-----------|-----------|
| C | 1.997629  | -0.578988 | 0.000064  |
| H | 2.432666  | -0.968516 | 0.917424  |
| H | 2.433147  | -0.969186 | -0.916777 |
| C | -1.747983 | -0.707964 | 0.000026  |
| H | -2.730653 | -0.224900 | -0.000204 |
| H | -1.664510 | -1.343406 | -0.885577 |
| H | -1.664699 | -1.342973 | 0.885963  |
| C | -0.699782 | 0.332925  | -0.000070 |
| C | -0.113222 | 1.480449  | 0.000130  |
| B | 0.914839  | 0.338090  | -0.000347 |

### A8

**E=-180.12592 a.u.**

|   |           |           |           |
|---|-----------|-----------|-----------|
| C | 1.694499  | -0.699798 | 0.006360  |
| H | 1.647649  | -1.462826 | 0.777899  |
| H | 2.465864  | -0.789266 | -0.752308 |
| C | -1.674669 | -0.619915 | -0.033881 |
| H | -2.666191 | -0.172598 | -0.149638 |
| H | -1.486773 | -1.283191 | -0.886046 |
| H | -1.674866 | -1.237307 | 0.871103  |
| C | -0.646075 | 0.441528  | 0.023234  |
| B | 0.102635  | 1.637977  | 0.037330  |
| C | 0.826435  | 0.337403  | -0.003657 |

### A9

**E=-180.20828 a.u.**

|   |           |           |           |
|---|-----------|-----------|-----------|
| C | -2.733315 | 0.005312  | 0.000035  |
| H | -3.287132 | 0.939521  | 0.000037  |
| H | -3.297007 | -0.922999 | 0.000050  |
| C | -0.130754 | -0.008409 | -0.000062 |
| C | -1.414217 | -0.001734 | -0.000008 |
| B | 1.235724  | -0.016217 | -0.000073 |
| C | 2.765097  | 0.000596  | 0.000026  |

|   |          |           |           |
|---|----------|-----------|-----------|
| H | 3.188752 | -0.478088 | 0.890257  |
| H | 3.188974 | -0.476876 | -0.890745 |
| H | 3.106931 | 1.044941  | 0.000812  |

**A10**

**E=-180.20735 a.u.**

|   |           |           |           |
|---|-----------|-----------|-----------|
| C | -2.890802 | -0.000249 | 0.000042  |
| H | -3.475464 | -0.917689 | 0.000075  |
| H | -3.476571 | 0.916477  | 0.000089  |
| C | -0.039137 | 0.000791  | -0.000136 |
| C | 2.638459  | -0.001774 | 0.000815  |
| H | 3.011172  | 1.013888  | -0.176237 |
| H | 3.041755  | -0.347524 | 0.959139  |
| H | 3.031974  | -0.643809 | -0.795315 |
| B | -1.498348 | 0.000494  | -0.000266 |
| C | 1.184626  | -0.002737 | 0.001542  |

**TS<sub>A1-A3</sub>**

**E=-180.12248 a.u.**

|   |           |           |           |
|---|-----------|-----------|-----------|
| C | -1.938113 | -0.405822 | 0.000011  |
| H | -2.408257 | -0.773132 | 0.915750  |
| H | -2.408266 | -0.773200 | -0.915694 |
| C | -0.477833 | -0.168450 | -0.000021 |
| C | -1.347621 | 0.977668  | -0.000004 |
| B | 0.898811  | -0.164233 | -0.000009 |
| C | 2.415504  | -0.022970 | 0.000010  |
| H | 2.680000  | 1.042641  | -0.000064 |
| H | 2.865425  | -0.478793 | 0.889351  |
| H | 2.865417  | -0.478914 | -0.889274 |

**TS<sub>A3-A9</sub>**

**E=-180.09593 a.u.**

|   |           |           |           |
|---|-----------|-----------|-----------|
| C | -2.107837 | 0.560684  | 0.000213  |
| H | -2.339230 | 1.091975  | 0.926298  |
| H | -2.350404 | 1.078594  | -0.930581 |
| C | -0.305026 | -0.451854 | -0.003983 |
| C | -1.633326 | -0.724841 | 0.006673  |
| B | 1.004991  | -0.039743 | -0.016315 |
| C | 2.527012  | 0.179894  | -0.002106 |
| H | 2.901358  | -0.052599 | 1.005254  |
| H | 2.836818  | 1.203750  | -0.237581 |
| H | 3.041566  | -0.506302 | -0.686596 |

**TS<sub>A1-A4</sub>**

**E=-180.11911 a.u.**

|   |           |           |           |
|---|-----------|-----------|-----------|
| C | 2.038035  | -0.452021 | -0.000002 |
| H | 2.601561  | -0.517592 | -0.929864 |
| H | 2.601576  | -0.517588 | 0.929851  |
| C | 0.718363  | -0.245794 | 0.000007  |
| C | 0.332595  | 1.281035  | -0.000002 |
| B | -0.664701 | 0.188365  | 0.000000  |
| C | -2.142679 | -0.341434 | -0.000004 |
| H | -2.675414 | 0.037868  | -0.879369 |
| H | -2.206796 | -1.432815 | -0.000165 |
| H | -2.675304 | 0.037591  | 0.879550  |

**TS<sub>A4-A9</sub>**

**E=-180.17473 a.u.**

|   |           |           |           |
|---|-----------|-----------|-----------|
| C | -1.964207 | -0.678429 | -0.005665 |
| H | -2.150548 | -1.280909 | 0.877192  |
| H | -2.556722 | -0.867439 | -0.895092 |
| C | -1.058193 | 0.295193  | 0.010940  |
| C | -0.205573 | 1.305632  | 0.032153  |
| B | 0.875926  | 0.409889  | -0.012516 |
| C | 2.085731  | -0.525048 | -0.015102 |
| H | 2.960025  | -0.016917 | -0.437685 |
| H | 2.338598  | -0.850104 | 1.000579  |
| H | 1.882468  | -1.418166 | -0.616370 |

**1**

**E=-2011.13769 a.u.**

|    |           |           |           |
|----|-----------|-----------|-----------|
| Cl | 0.547059  | -0.277092 | 2.384148  |
| Cl | 3.257943  | -0.062491 | 0.003343  |
| Cl | 0.561459  | 0.262278  | -2.380556 |
| C  | -1.893001 | 2.344709  | -0.849437 |
| H  | -2.674738 | 3.086073  | -0.658193 |
| H  | -1.751133 | 2.277108  | -1.936607 |
| C  | -1.972728 | -2.273596 | 0.854376  |
| H  | -1.818642 | -2.202330 | 1.939729  |
| H  | -2.783108 | -2.986533 | 0.675239  |
| B  | -0.549707 | 2.808649  | -0.210448 |
| B  | -0.651659 | -2.789263 | 0.208615  |
| C  | -3.681730 | 0.706728  | -0.220929 |
| H  | -4.485874 | 1.387529  | -0.454724 |
| C  | -3.704191 | -0.577893 | 0.216357  |
| H  | -4.531604 | -1.231187 | 0.447508  |
| Sc | 0.887768  | -0.016451 | 0.001865  |
| C  | 1.705761  | 3.404728  | 0.824988  |
| H  | 2.593573  | 3.587565  | 0.221922  |
| H  | 1.861632  | 3.457342  | 1.901335  |
| C  | 1.578230  | -3.461755 | -0.835469 |
| H  | 2.460412  | -3.679093 | -0.235550 |
| H  | 1.729498  | -3.515363 | -1.912420 |
| C  | -1.524559 | 0.027499  | 0.000548  |
| N  | -2.382830 | -0.969496 | 0.338207  |
| N  | -2.347460 | 1.053314  | -0.339001 |
| C  | 0.678112  | -2.384874 | -0.329030 |
| C  | 0.258678  | -3.776459 | -0.296726 |
| C  | 0.766006  | 2.358868  | 0.325288  |
| C  | 0.397068  | 3.764531  | 0.288274  |

**2**

**E=-817.89160 a.u.**

|    |           |           |           |
|----|-----------|-----------|-----------|
| Ti | 0.003370  | 0.233606  | -0.002206 |
| C  | -2.253443 | 0.248659  | -0.407277 |
| C  | -3.680878 | 0.267445  | -0.645687 |
| B  | -3.200941 | -0.667871 | 0.336613  |
| C  | -2.868519 | 1.189110  | -1.413514 |
| H  | -2.672993 | 0.975572  | -2.463537 |
| H  | -2.873958 | 2.246192  | -1.150849 |
| C  | -3.318153 | -1.781110 | 1.396104  |
| H  | -4.029053 | -1.495355 | 2.178788  |
| H  | -3.690985 | -2.703907 | 0.937672  |
| H  | -2.347637 | -1.986613 | 1.854668  |
| F  | 0.112697  | -1.023531 | 1.307914  |
| F  | -0.560276 | 1.501990  | 1.172183  |

|   |           |           |           |                           |           |           |           |          |
|---|-----------|-----------|-----------|---------------------------|-----------|-----------|-----------|----------|
| F | 0.573022  | 1.500376  | -1.175558 | <b>E=-3606.26164 a.u.</b> | B         | -0.583539 | 1.102496  | 2.405393 |
| F | -0.110180 | -1.018733 | -1.313845 | B                         | 1.531139  | 1.993773  | 1.629583  |          |
| C | 2.257673  | 0.243992  | 0.412916  | Mn                        | -0.017643 | 0.258545  | -0.437263 |          |
| C | 3.684150  | 0.251900  | 0.655048  | C                         | -1.655933 | -1.130211 | 1.678567  |          |
| B | 3.202202  | -0.673549 | -0.334556 | C                         | 3.019344  | 0.953278  | -0.183389 |          |
| C | 2.875320  | 1.173449  | 1.427195  | H                         | 0.607653  | 2.554173  | 3.595411  |          |
| H | 2.675405  | 0.953779  | 2.475132  | H                         | -0.179530 | 3.216963  | 2.144365  |          |
| H | 2.888233  | 2.232318  | 1.172123  | C                         | -4.033159 | -1.806910 | 1.222288  |          |
| C | 3.294172  | -1.779792 | -1.403037 | C                         | -2.712515 | -0.823744 | -0.577133 |          |
| H | 2.817723  | -1.447107 | -2.330840 | H                         | -4.106395 | -2.132976 | 2.257578  |          |
| H | 4.328983  | -2.063442 | -1.612441 | C                         | -3.830136 | -0.963134 | -1.424396 |          |
| H | 2.744543  | -2.666487 | -1.069192 | C                         | -5.015050 | -1.514004 | -0.956568 |          |

### 3

**E=-1707.29620 a.u.**

|    |           |           |           |
|----|-----------|-----------|-----------|
| Cl | 2.793451  | 0.000156  | 0.029797  |
| Cl | 0.360664  | -2.148511 | -0.336764 |
| C  | -3.031466 | 0.000027  | 1.765970  |
| H  | -2.636282 | 0.880291  | 2.283890  |
| H  | -4.121371 | -0.000386 | 1.851731  |
| H  | -2.635577 | -0.879793 | 2.284115  |
| B  | -2.577329 | -0.000011 | 0.297241  |
| C  | -1.600987 | -0.000101 | -2.092805 |
| H  | -1.367397 | -0.924508 | -2.620571 |
| H  | -1.367415 | 0.924286  | -2.620617 |
| C  | -1.308668 | -0.000051 | -0.594070 |
| C  | -2.660933 | -0.000083 | -1.122337 |
| V  | 0.621852  | -0.000025 | 0.270828  |
| Cl | 0.360416  | 2.148474  | -0.336850 |
| O  | 0.322175  | -0.000002 | 1.788818  |

### 4

**E=-1366.95387 a.u.**

|    |           |           |           |
|----|-----------|-----------|-----------|
| C  | -1.103351 | 0.950595  | 0.741624  |
| C  | -2.075833 | 1.635905  | 1.620551  |
| B  | -2.584252 | 0.480849  | 0.985091  |
| C  | -0.769962 | 2.234521  | 1.504528  |
| H  | -0.642716 | 3.126532  | 0.892867  |
| H  | -0.074021 | 2.146823  | 2.338830  |
| C  | -3.590800 | -0.618301 | 0.589435  |
| H  | -3.293936 | -1.586625 | 1.007160  |
| H  | -4.596845 | -0.382636 | 0.948288  |
| H  | -3.614464 | -0.740740 | -0.498017 |
| Cl | 0.852022  | 1.597454  | -1.757455 |
| Cl | -0.840146 | -1.570901 | -1.786850 |
| C  | 1.097248  | -0.960388 | 0.735115  |
| C  | 2.065973  | -1.658525 | 1.607841  |
| B  | 2.578985  | -0.497671 | 0.986717  |
| C  | 0.758364  | -2.251712 | 1.482443  |
| H  | 0.629744  | -3.136489 | 0.860638  |
| H  | 0.061163  | -2.171403 | 2.316440  |
| C  | 3.589441  | 0.602870  | 0.605315  |
| H  | 3.284854  | 1.571151  | 1.017347  |
| H  | 4.590746  | 0.368846  | 0.978179  |
| H  | 3.628354  | 0.724581  | -0.481833 |
| Cr | 0.001045  | 0.004287  | -0.512787 |

### 5

### 6

**E=-621.85477 a.u.**

|    |           |           |           |
|----|-----------|-----------|-----------|
| B  | 1.516753  | 2.234834  | -0.146819 |
| C  | -0.091489 | 2.035654  | -2.142143 |
| H  | -0.976650 | 2.657071  | -2.277188 |
| H  | 0.082034  | 1.304217  | -2.932358 |
| C  | 2.448220  | 2.291683  | 1.080227  |
| H  | 2.782162  | 1.284496  | 1.349504  |
| H  | 3.328079  | 2.905097  | 0.864715  |
| H  | 1.939212  | 2.716171  | 1.951590  |
| Fe | -0.765610 | 0.181665  | 0.214690  |
| C  | -0.124849 | 0.452201  | 1.820963  |
| O  | 0.203453  | 0.587590  | 2.919968  |
| I  | 1.268227  | -1.417758 | -0.299364 |
| C  | -2.257237 | -0.191484 | -1.286868 |
| H  | -2.096670 | -0.120064 | -2.353282 |
| C  | -2.083902 | -1.358012 | -0.500479 |
| H  | -1.721928 | -2.311053 | -0.860228 |
| C  | -2.363668 | -1.043499 | 0.854703  |

|   |           |           |           |   |          |           |           |
|---|-----------|-----------|-----------|---|----------|-----------|-----------|
| H | -2.299867 | -1.722915 | 1.693460  | C | 1.670636 | -0.320307 | -0.031529 |
| C | -2.654071 | 0.865227  | -0.409958 | C | 2.994964 | 0.289583  | -0.092834 |
| H | -2.862757 | 1.889503  | -0.688725 | B | 1.888612 | 1.196603  | -0.008178 |
| C | -2.725548 | 0.344026  | 0.907558  | C | 2.920017 | -1.159107 | -0.125833 |
| H | -3.001572 | 0.898958  | 1.794638  | H | 3.104997 | -1.674071 | -1.067750 |
| C | 0.208814  | 1.553245  | -0.713510 | H | 3.210981 | -1.720843 | 0.760968  |
| C | 1.028128  | 2.557878  | -1.424401 | C | 1.203326 | 2.576919  | 0.072877  |

## 7

**E=-845.04567 a.u.**

|    |           |           |           |    |           |           |           |
|----|-----------|-----------|-----------|----|-----------|-----------|-----------|
| B  | -3.003319 | -0.096066 | 0.525709  | Cu | -0.200320 | -0.691716 | 0.082208  |
| C  | -2.344611 | 2.028346  | -0.805787 | C  | -2.106840 | -1.039020 | 0.211163  |
| H  | -2.378558 | 2.067769  | -1.894232 | H  | -2.295447 | -2.020600 | -0.242916 |
| H  | -2.039718 | 2.952053  | -0.314676 | H  | -2.373484 | -1.094682 | 1.275093  |
| C  | -3.308752 | -1.382177 | 1.307468  | C  | -2.853245 | 0.032007  | -0.487264 |
| H  | -3.787510 | -1.133747 | 2.261500  | C  | -3.487615 | 1.087522  | 0.058089  |
| H  | -4.021362 | -1.997248 | 0.745630  | H  | -3.989430 | 1.828864  | -0.557953 |
| H  | -2.421017 | -1.984758 | 1.512427  | H  | -2.871563 | -0.045071 | -1.578366 |
| B  | 3.004110  | 0.107272  | 0.526139  | H  | -3.524923 | 1.235545  | 1.136440  |
| C  | 2.348329  | -2.036184 | -0.775967 |    |           |           |           |
| H  | 2.379844  | -2.088954 | -1.863926 |    |           |           |           |
| H  | 2.047057  | -2.954536 | -0.272750 |    |           |           |           |
| C  | 3.308020  | 1.400411  | 1.296801  |    |           |           |           |
| H  | 3.630790  | 1.157448  | 2.316056  |    |           |           |           |
| H  | 4.138524  | 1.932525  | 0.819456  |    |           |           |           |
| H  | 2.452919  | 2.077175  | 1.360644  |    |           |           |           |
| Co | -0.000049 | -0.001981 | -0.168025 |    |           |           |           |
| C  | 0.008951  | 0.052229  | 1.642117  |    |           |           |           |
| C  | -0.593116 | -1.486064 | -1.053690 |    |           |           |           |
| C  | 0.582390  | 1.426677  | -1.144657 |    |           |           |           |
| O  | 0.013116  | 0.085848  | 2.785812  |    |           |           |           |
| O  | 0.941332  | 2.315609  | -1.767984 |    |           |           |           |
| O  | -0.958322 | -2.408788 | -1.621772 |    |           |           |           |
| C  | 3.229372  | -1.135839 | -0.101370 |    |           |           |           |
| C  | 1.836446  | -0.711812 | -0.162641 |    |           |           |           |
| C  | -1.835405 | 0.710439  | -0.177253 |    |           |           |           |
| C  | -3.227060 | 1.138702  | -0.118547 |    |           |           |           |

## 8

**E=-576.10762 a.u.**

|    |           |           |           |
|----|-----------|-----------|-----------|
| C  | -1.164348 | 0.000483  | 0.552689  |
| C  | -2.608816 | 0.000692  | 0.872159  |
| B  | -2.279332 | -0.000204 | -0.511043 |
| C  | -1.691176 | 0.001315  | 1.983734  |
| H  | -1.549699 | 0.917771  | 2.556223  |
| H  | -1.549755 | -0.914545 | 2.557194  |
| C  | -2.552565 | -0.001085 | -2.033395 |
| H  | -2.104673 | -0.882373 | -2.505450 |
| H  | -3.624331 | -0.000702 | -2.251101 |
| H  | -2.103736 | 0.879065  | -2.506660 |
| C  | 1.525735  | -1.520000 | -0.127156 |
| C  | 1.526145  | 1.519629  | -0.128459 |
| O  | 2.139913  | -2.484387 | -0.268651 |
| O  | 2.140589  | 2.483741  | -0.270697 |
| Ni | 0.638392  | 0.000027  | 0.082227  |

## 9

**E=-493.60946 a.u.**
